# Supplementary material for: Smoking and the risk of type 2 diabetes in Japan: A systematic review and meta-analysis
Source: PubMed Central journal article supplement (PMC5623034; doi:10.1016/j.je.2016.12.017), 2017-07-14
Supplement: mmc1.pdf [file mmc1.pdf]

**eTable 1.** Methods for analysis and confounding variables for smoking (current or former) and risk of type 2 diabetes

| Source                | Method for Analysis             | Risk Estimates | Confounding Variables                                                                                                                                                                                                                                                             |
|-----------------------|---------------------------------|----------------|-----------------------------------------------------------------------------------------------------------------------------------------------------------------------------------------------------------------------------------------------------------------------------------|
| Kawakami et al. 1997  | Proportional hazards regression | HR             | Age, BMI, heredity, physical activity, alcohol consumption, education, occupation, shift work                                                                                                                                                                                     |
| Sugimori et al. 1998  | Proportional hazards regression | HR             | Age, BMI, heredity, physical activity, blood pressures, total cholesterol, HDL cholesterol, triglyceride, glucose, eating breakfast, uric acid, dairy intake                                                                                                                      |
| Uchimoto et al. 1999  | Proportional hazards regression | RR             | Age, BMI, physical activity, heredity, alcohol consumption, fasting plasma glucose, total cholesterol, triglycerides, HDL cholesterol, hematocrit                                                                                                                                 |
| Nakanishi et al. 2000 | Proportional hazards regression | RR             | Age, BMI, heredity, blood pressure, physical activity, alcohol consumption, total cholesterol, HDL cholesterol, triglyceride, uric acid, fasting glucose status, hematocrit                                                                                                       |
| Sawada et al. 2003    | Proportional hazards regression | HR             | Age, BMI, heredity, blood pressure, alcohol consumption                                                                                                                                                                                                                           |
| Sairenchi et al. 2004 | Proportional hazards regression | RR             | Age, BMI, heredity, blood pressure, alcohol consumption, total cholesterol, triglycerides, HDL cholesterol, antihypertensive treatment, fasting glucose status                                                                                                                    |
| Hayashino et al. 2008 | Proportional hazards regression | HR             | Age, sex, BMI, alcohol consumption, physical activity, hypertension, health promotion intervention, sweetened beverage, vegetable intake, not care about eating too much fat                                                                                                      |
| Nagaya et al. 2008    | Proportional hazards regression | HR             | Age, alcohol consumption, exercise, education                                                                                                                                                                                                                                     |
| Fukui et al. 2011     | Proportional hazards regression | HR             | Age, sex, BMI, blood pressure, fasting glucose status, total cholesterol, triglyceride, HDL-cholesterol, r-GTP, uric acid, creatinine, white blood cell count, hemoglobin, alcohol consumption, physical activity, family history of diabetes, and family history of hypertension |
| Ide et al. 2011       | Proportional hazards regression | HR             | Age, sex, BMI, triglyceride, hypertension, HDL cholesterol, and gamma-glutamyl transpeptidase                                                                                                                                                                                     |
| Morimoto et al. 2012  | Proportional hazards regression | HR             | Age, BMI, alcohol consumption, blood pressure, exercise, fasting status, total cholesterol, triglyceride, heredity, blood glucose level.                                                                                                                                          |
| Teratani et al. 2012  | Proportional hazards regression | HR             | Age, BMI, alcohol consumption, arterial pressure, serum cholesterol, aspartate aminotransferase, creatinine, shift work, physical activity, uric acid                                                                                                                             |
| Heianza et al. 2012   | Multiple logistic regression    | OR             | Age, sex, BMI, family history of diabetes, resting heart rate, hypertension, history of hyperlipidemia, fasting plasma glucose, HbA1c                                                                                                                                             |
| Doi et al. 2012       | Proportional hazards regression | HR             | Age, sex, BMI, central obesity, physical activity, hypertension, FPG levels, family history of diabetes                                                                                                                                                                           |
| Katsuta et al. 2012   | Multiple logistic regression    | OR             | Age, sex, BMI, alcohol consumption, physical activity                                                                                                                                                                                                                             |
| Oba et al. 2012       | Multiple logistic regression    | OR             | Age, BMI, heredity, hypertension, alcohol consumption, physical activity, weight change, study area                                                                                                                                                                               |
| Kaneto et al. 2013    | Proportional hazards regression | HR             | Age, sex, BMI change, BMI at age 20 years, job type, family history of diabetes, hypertension, exercise, hours of sleep, alcohol consumption, coffee consumption,                                                                                                                 |

---

|                    |                                 |    |                                                                                                                                                                                                                                                                    |
|--------------------|---------------------------------|----|--------------------------------------------------------------------------------------------------------------------------------------------------------------------------------------------------------------------------------------------------------------------|
| Hilawe et al. 2015 | Proportional hazards regression | HR | regular mealtimes, job stress<br>Age, sex, BMI, heredity, physical activity, alcohol consumption, sugar and energy, sleep duration, arterial pressure, total cholesterol to HDL cholesterol ratio, HOMA2-IR, triglyceride, adiponectin, leptin, C-reactive protein |
| Akter et al. 2015  | Proportional hazards regression | HR | Age, sex, BMI, worksite, waist circumference, hypertension                                                                                                                                                                                                         |

---

BMI, body mass index; FPG, fasting plasma glucose; HbA1c, glycated hemoglobin A1c; HDL, high-density lipoprotein; HOMA2-IR, Homeostatis Model Assessment of insulin resistant; HR, hazard ratio; OR, odds ratio; RR, relative risk.

**eTable 2.** Characteristics of studies included in the Meta-analysis of smoking cessation years and risk of type 2 diabetes

| Source               | Study designation                                                             | Sex           | Baseline age group | Sample size | Maximum follow-up years | Number of cases | Adjusted variables                                                                                                                                          | Years since quitting smoking, HR (95% confidence interval)                                                                                                                                                  |
|----------------------|-------------------------------------------------------------------------------|---------------|--------------------|-------------|-------------------------|-----------------|-------------------------------------------------------------------------------------------------------------------------------------------------------------|-------------------------------------------------------------------------------------------------------------------------------------------------------------------------------------------------------------|
| Morimoto et al. 2012 | Japanese individuals undergoing health check-up at central hospital in Nagoya | Men           | 40–69              | 2070        | 16                      | 246             | Age, blood glucose, fasting, SBP, total cholesterol, triglycerides, alcohol consumption, exercise, family history of diabetes, BMI (time varying covariate) | BMI<23: <3y, 1.91 (0.60-6.06); (3-5)y, 1.95 (0.62-6.17); (6-9) y, 0.59 (0.13-2.64), 2.22 (1.05-4.69). BMI≥23: <3y, 2.98 (1.38-6.27); (3-5)y, 2.49 (1.18-5.26); (6-9) y, 1.77 (0.75-4.17), 2.47 (1.45-4.21). |
| Oba et al. 2012      | JPHC Study                                                                    | Men           | 40–69              | 35,320      | 5                       | 1162            | Age, hypertension, alcohol intake, family history of diabetes, study area, leisure time physical activity, BMI                                              | <5 y, 1.41 (1.10-1.81); (5-9)y, 1.12 (0.87-1.46); (10-14) y, 0.73 (0.53-1.00); (15-19)y, 0.87 (0.61-1.25); ≥20 y, 0.95 (0.69-1.29).                                                                         |
| Akter et al. 2015    | J-ECOH Study                                                                  | Men and Women | 15–83              | 38,557      | 4                       | 1889            | Age, sex, worksite, hypertension                                                                                                                            | <5 y, 1.36 (1.14-1.62); (5-9)y, 1.23 (1.01-1.51); ≥10 y, 1.02 (0.85-1.23).                                                                                                                                  |

BMI, body mass index; HR, hazard ratio; JPHC, Japan Public Health Center-based; J-ECOH, Japan Epidemiology Collaboration on Occupational Health; SBP, systolic blood pressure.

**eTable 3.** Assessment of study quality

| Author          | Year | Selection                                    |                                                 |                           |                                          | Comparability                      |                                                  | Outcome                       |                                             |                                 | Total score |
|-----------------|------|----------------------------------------------|-------------------------------------------------|---------------------------|------------------------------------------|------------------------------------|--------------------------------------------------|-------------------------------|---------------------------------------------|---------------------------------|-------------|
|                 |      | 1                                            | 2                                               | 3                         | 4                                        | 5A                                 | 5B                                               | 6                             | 7                                           | 8                               |             |
|                 |      | Exposed cohort truly/somewhat representative | Nonexposed cohort drawn from the same community | Ascertainment of exposure | Outcome of interest not present at start | Cohorts controlled for age and sex | Cohorts controlled for other important factor(s) | Quality of outcome assessment | Follow-up long enough for outcomes to occur | Complete accounting for cohorts |             |
| Kawakami et al  | 1997 |                                              | *                                               |                           | *                                        | *                                  | *                                                | *                             | *                                           |                                 | 6           |
| Sugimori et al  | 1998 | *                                            | *                                               |                           | *                                        | *                                  | *                                                | *                             | *                                           |                                 | 7           |
| Uchimoto et al  | 1999 |                                              | *                                               |                           | *                                        | *                                  | *                                                | *                             | *                                           |                                 | 6           |
| Nakanishi et al | 2000 |                                              | *                                               |                           | *                                        | *                                  | *                                                | *                             | *                                           | *                               | 7           |
| Sawada et al    | 2003 |                                              | *                                               |                           | *                                        | *                                  | *                                                | *                             | *                                           |                                 | 6           |
| Sairenchi et al | 2004 | *                                            | *                                               |                           | *                                        | *                                  | *                                                | *                             | *                                           |                                 | 7           |
| Hayashino et al | 2008 |                                              | *                                               |                           | *                                        | *                                  | *                                                | *                             | *                                           |                                 | 6           |
| Nagaya et al    | 2008 |                                              | *                                               |                           | *                                        | *                                  | *                                                | *                             | *                                           |                                 | 6           |
| Fukui et al     | 2011 |                                              | *                                               |                           | *                                        | *                                  | *                                                | *                             | *                                           |                                 | 6           |
| Ide et al       | 2011 |                                              | *                                               |                           | *                                        | *                                  | *                                                | *                             | *                                           |                                 | 6           |
| Morimoto et al  | 2012 |                                              | *                                               |                           | *                                        | *                                  | *                                                | *                             | *                                           |                                 | 6           |
| Heianza et al   | 2012 |                                              | *                                               |                           | *                                        | *                                  | *                                                | *                             | *                                           |                                 | 6           |
| Katsuta et al   | 2012 |                                              | *                                               |                           | *                                        | *                                  | *                                                | *                             | *                                           |                                 | 6           |
| Doi et al       | 2012 |                                              | *                                               |                           | *                                        | *                                  | *                                                | *                             | *                                           |                                 | 6           |
| Oba et al       | 2012 | *                                            | *                                               |                           | *                                        | *                                  | *                                                | *                             | *                                           |                                 | 6           |
| Kaneto et al    | 2013 |                                              | *                                               |                           | *                                        | *                                  | *                                                | *                             | *                                           |                                 | 6           |
| Teratani et al  | 2012 |                                              | *                                               |                           | *                                        | *                                  | *                                                | *                             | *                                           |                                 | 6           |
| Hilawe et al    | 2015 |                                              | *                                               |                           | *                                        | *                                  | *                                                | *                             | *                                           |                                 | 6           |
| Akter et al     | 2015 | *                                            | *                                               |                           | *                                        | *                                  | *                                                | *                             | *                                           |                                 | 7           |

**eTable 4.** Characteristics of studies and summary findings examining passive smoking and risk of type 2 diabetes in Japan

| Reference, Year       | n    | Male (%) | Mean baseline age | Mean follow-up years | Number of cases | Reference group                            | Passive smoking HR (95% CI)                                                                                |
|-----------------------|------|----------|-------------------|----------------------|-----------------|--------------------------------------------|------------------------------------------------------------------------------------------------------------|
| Hayashino et al, 2008 | 6498 | 79.1     | 38.2              | 3.4                  | 229             | Never smoker + no exposed to passive smoke | Exposed at workplace: 1.81 (1.06-3.19)<br>Exposed at home: 0.80 (0.46-1.40)<br>Pooled HR: 1.20 (0.54-2.68) |

CI, confidence interval; HR, hazard ratio.

(A)

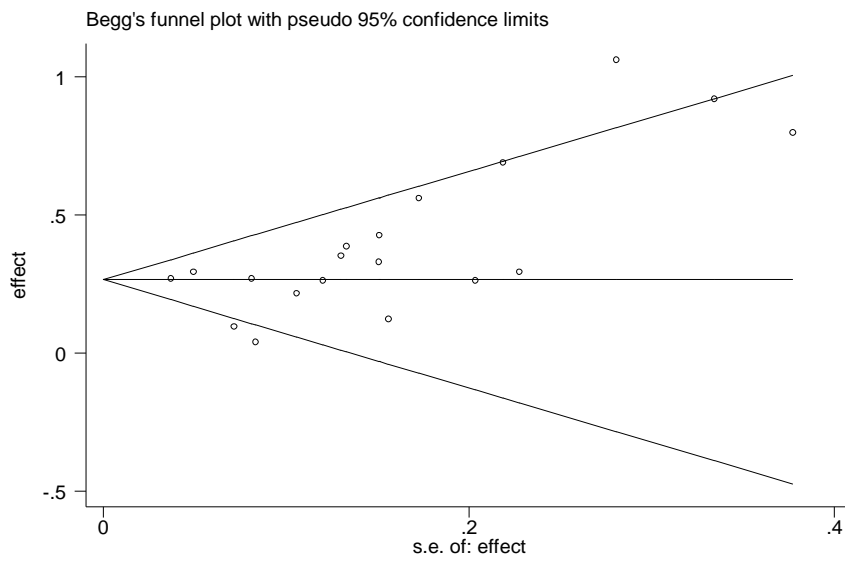

(B)

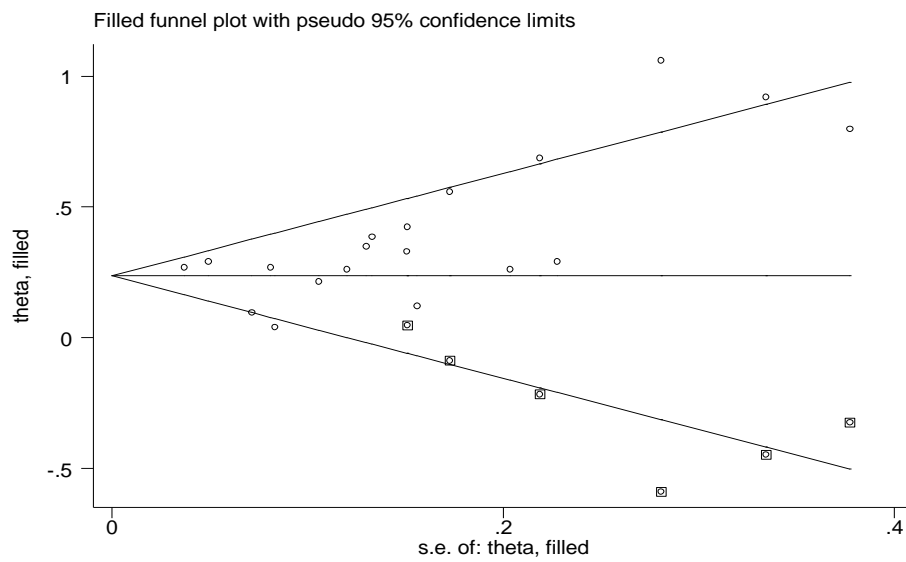

**eFigure 1.** Funnel plots without (A) and with trim and fill (B)
